# Supplementary material for: Transcriptome differences between Cupriavidus necator NH9 grown with 3-chlorobenzoate and that grown with benzoate
Source: Research Square preprint supplement (doi:10.21203/rs.3.rs-50641/v3), 2020-11-10
Supplement: Supplementary file 1 [file 4a3934e2a79271d501e78ccc.xlsx]

## Sheet: TableS5
Table S5 Aromatic compound transporters that have been experimentally verified or examined for their functions
Family	Protein	Accession number	Componenta	Strain	Substrate or putative substrate	Reference
Major facilitator superfamily (MFS)
Aromatic acid:H+ symporter (AAHS) family
	BenKb	CAG68298.1	-	Acinetobacter baylyi ADP1	Benzoate	1
	BenKb	WP_011015098.1	-	Corynebacterium glutamicum ATCC 13032	Benzoate	2
	BenKb	WP_037061762.1	-	Pseudomonas putida CSV86	Benzoate	3
	BenPb	AAZ63295.1	-	Cupriavidus pinatubonensis JMP134	3-Chlorobenzoate	4
	GalTb	CBJ94499.1	-	Pseudomonas putida KTGAL	Gallate	5
	GenKb	WP_011015577.1	-	Corynebacterium glutamicum ATCC 13032	2,5-Dihydroxybenzoate	6
	MhbTb	AAW63412.1	-	Klebsiella pneumoniae M5a1	3-Hydroxybenzoate	7
	MhpTb	APC50650.1	-	Escherichia coli K-12 substr. W3110	3-(3-Hydroxyphenyl) propionate	8
	PcaKb	CAG68551.1	-	Acinetobacter baylyi ADP1	3,4-Dihydroxybenzoate, 4-Hydroxybenzoate, Vanillate	9, 10
	PcaKb	AAA85137.1	-	Pseudomonas putida PRS2000	3,4-Dihydroxybenzoate, 4-Hydroxybenzoate	11, 12
	TfdKb	AAZ65767.1	-	Cupriavidus pinatubonensis JMP134	2,4-Dichlorophenoxyacetate	13
Metabolite:H+ symporter (MHS) family
	CouT	ABG96912.1	-	Rhodococcus jostii RHA1	p-Coumarate, Ferulate	14
	MopB	AAB41509.1	-	Burkholderia cepacia Pc701	4-Methyl-o-phthalate, Phthalate	15
	PhdTc	BAB97676.1	-	Corynebacterium glutamicum ATCC 13032	3-(4-Hydroxyphenyl)-3-propionate, p-coumarate, Caffeate, Ferulate	16
Anion/cation symporter (ACS) family
	HpaXb	ADT77978.1	-	Escherichia coli W	4-Hydroxyphenylacetate	17
	OphDb	BAG45577.1	-	Burkholderia multivorans ATCC 17616	Phthalate	18
ATP-binding cassette (ABC)
Hydrophobic amino acid uptake transporter (HAAT) family
	PcaMc	CAC49880.1	SBP	Sinorhizobium meliloti 1021	3,4-Dihydroxybenzoate	19
	PcaNc	CAC49879.1	TMD
	PcaVc	CAC49878.1	TMD
	PcaWc	CAC49877.1	NBD
	PcaXc	CAC49876.1	NBD
	HmgDc	AAY18216.1	SBP	Pseudomonas putida U	2,5-Dihydroxyphenylacetate	20
	HmgEc	AAY18215.1	TMD
	HmgFc	AAY18214.1	TMD
	HmgGc	AAY18213.1	NBD
	HmgHc	AAY18212.1	NBD
Taurine uptake transporter (TauT) family
	OphFb	BAG45603.1	SBP	Burkholderia multivorans ATCC 17616	Phthalate	21
	OphG	BAG45602.1	TMD
	OphH	BAG45601.1	NBD
	PatA	ABG99217.1	NBD	Rhodococcus jostii RHA1	Phthalate	22
	PatBb	ABG99216.1	TMD
	PatC	ABG99215.1	TMD
	PatD	ABG99218.1	SBP
Benzoate/H+ symporter (BenE) family
	BenE1	AAN67649.1	-	Pseudomonas putida KT2440	Benzoate	23
	BenE2	AAN68775.1	-
Divalent anion/Na+ symporter (DASS) family
	GacPc	CCC80015.1	-	Lactobacillus plantarum WCFS1	Gallate	24
Solute/sodium symporter (SSS) family
	PaaLb	AAC24338.1	-	Pseudomonas putida U	Phenylacetate	25
Tripartite ATP-independent periplasmic transporter (TRAP-T) family
	FcbT1b	AAF16407.1	SBP	Pseudomonas sp. DJ-12	4-Chlorobenzoate	26
	FcbT2b	AAF16408.1	SC
	FcbT3b	AAF16409.1	LC
	TarP	CAE27223.1	SBP	Rhodopseudomonas palustris CGA009	p-Coumarate, Caffeate, Cinnamate, Ferulate	27
	TarQ	CAE27224.1	SC
	TarM	CAE27225.1	LC
Tripartite tricarboxylate transporter (TTT) family
	TpiAb	BAN66716.1	LC	Comamonas sp. E6	Terephthalate	28
	TpiBb	BAN66715.1	SC
	TphCII	BAE47084.1	SBP
aLC, large component; NBD, nucleotide binding domain; SBP, substrate binding protein; SC, small component; TMD, transmembrane domain.
bThe function of transporters has been experimentally verified by uptake assays with radioisotopes, biosensors or reconstituted proteoliposomes.
cThe function of transporters has been experimentally examined by genetic disruption/complementation.
References
1. Collier LS, Nichols NN, Neidle EL. benK encodes a hydrophobic permease-like protein involved in benzoate degradation by Acinetobacter sp. strain ADP1. J Bacteriol. 1997;179(18):5943-6.
2. Wang S-H, Xu Y, Liu S-J, Zhou N-Y. Conserved residues in the aromatic acid/H+ symporter family are important for benzoate uptake by NCgl2325 in Corynebacterium glutamicum. Int Biodeterior Biodegradation. 2011;65(3):527-32.
3. Choudhary A, Purohit H, Phale PS. Benzoate transport in Pseudomonas putida CSV86. FEMS Microbiol Lett. 2017;364(12).
4. Ledger T, Aceituno F, Gonzalez B. 3-chlorobenzoate is taken up by a chromosomally encoded transport system in Cupriavidus necator JMP134. Microbiology. 2009;155(Pt 8):2757-65.
5. Nogales J, Canales A, Jiménez-Barbero J, Serra B, Pingarrón JM, García JL, Díaz E. Unravelling the gallic acid degradation pathway in bacteria: the gal cluster from Pseudomonas putida. Mol Microbiol. 2011;79(2):359-74.
6. Xu Y, Wang SH, Chao HJ, Liu SJ, Zhou NY. Biochemical and molecular characterization of the gentisate transporter GenK in Corynebacterium glutamicum. PLoS One. 2012;7(7):e38701.
7. Xu Y, Gao X, Wang SH, Liu H, Williams PA, Zhou NY. MhbT is a specific transporter for 3-hydroxybenzoate uptake by Gram-negative bacteria. Appl Environ Microbiol. 2012;78(17):6113-20.
8. Xu Y, Chen B, Chao H, Zhou NY. mhpT encodes an active transporter involved in 3-(3-hydroxyphenyl)propionate catabolism by Escherichia coli K-12. Appl Environ Microbiol. 2013;79(20):6362-8.
9. D'Argenio DA, Segura A, Coco WM, Bünz PV, Ornston LN. The physiological contribution of Acinetobacter PcaK, a transport system that acts upon protocatechuate, can be masked by the overlapping specificity of VanK. J Bacteriol. 1999;181(11):3505-15.
10. Pernstich C, Senior L, MacInnes KA, Forsaith M, Curnow P. Expression, purification and reconstitution of the 4-hydroxybenzoate transporter PcaK from Acinetobacter sp. ADP1. Protein Expr Purif. 2014;101(100):68-75.
11. Harwood CS, Nichols NN, Kim MK, Ditty JL, Parales RE. Identification of the pcaRKF gene cluster from Pseudomonas putida: involvement in chemotaxis, biodegradation, and transport of 4-hydroxybenzoate. J Bacteriol. 1994;176(21):6479-88.
12. Nichols NN, Harwood CS. PcaK, a high-affinity permease for the aromatic compounds 4-hydroxybenzoate and protocatechuate from Pseudomonas putida. J Bacteriol. 1997;179(16):5056-61.
13. Leveau JH, Zehnder AJ, van der Meer JR. The tfdK gene product facilitates uptake of 2,4-dichlorophenoxyacetate by Ralstonia eutropha JMP134(pJP4). J Bacteriol. 1998;180(8):2237-43.
14. Otani H, Lee YE, Casabon I, Eltis LD. Characterization of p-hydroxycinnamate catabolism in a soil Actinobacterium. J Bacteriol. 2014;196(24):4293-303.
15. Saint CP, Romas P. 4-methylphthalate catabolism in Burkholderia (Pseudomonas) cepacia Pc701: a gene encoding a phthalate-specific permease forms part of a novel gene cluster. Microbiology. 1996;142 (Pt 9):2407-18.
16. Kallscheuer N, Vogt M, Kappelmann J, Krumbach K, Noack S, Bott M, Marienhagen J. Identification of the phd gene cluster responsible for phenylpropanoid utilization in Corynebacterium glutamicum. Appl Microbiol Biotechnol. 2016;100(4):1871-81.
17. Prieto MA, García JL. Identification of the 4-hydroxyphenylacetate transport gene of Escherichia coli W: construction of a highly sensitive cellular biosensor. FEBS Lett. 1997;414(2):293-7.
18. Chang HK, Zylstra GJ. Characterization of the phthalate permease OphD from Burkholderia cepacia ATCC 17616. J Bacteriol. 1999;181(19):6197-9.
19. MacLean AM, Haerty W, Golding GB, Finan TM. The LysR-type PcaQ protein regulates expression of a protocatechuate-inducible ABC-type transport system in Sinorhizobium meliloti. Microbiology. 2011;157(Pt 9):2522-33.
20. Arias-Barrau E, Sandoval A, Naharro G, Olivera ER, Luengo JM. A two-component hydroxylase involved in the assimilation of 3-hydroxyphenyl acetate in Pseudomonas putida. J Biol Chem. 2005;280(28):26435-47.
21. Chang HK, Dennis JJ, Zylstra GJ. Involvement of two transport systems and a specific porin in the uptake of phthalate by Burkholderia spp. J Bacteriol. 2009;191(14):4671-3.
22. Hara H, Stewart GR, Mohn WW. Involvement of a novel ABC transporter and monoalkyl phthalate ester hydrolase in phthalate ester catabolism by Rhodococcus jostii RHA1. Appl Environ Microbiol. 2010;76(5):1516-23.
23. Nishikawa Y, Yasumi Y, Noguchi S, Sakamoto H, Nikawa J. Functional analyses of Pseudomonas putida benzoate transporters expressed in the yeast Saccharomyces cerevisiae. Biosci. Biotechnol. Biochem. 2008;72(8):2034-8.
24. Reverón I, Jiménez N, Curiel JA, Peñas E, López de Felipe F, de Las Rivas B, Muñoz R. Differential gene expression by Lactobacillus plantarum WCFS1 in response to phenolic compounds reveals new genes involved in tannin degradation. Appl Environ Microbiol. 2017;83(7).
25. Olivera ER, Miñambres B, García B, Muñiz C, Moreno MA, Ferrández A, Díaz E, García JL, Luengo JM. Molecular characterization of the phenylacetic acid catabolic pathway in Pseudomonas putida U: the phenylacetyl-CoA catabolon. Proc Natl Acad Sci USA. 1998;95(11):6419-24.
26. Chae JC, Zylstra GJ. 4-chlorobenzoate uptake in Comamonas sp. strain DJ-12 is mediated by a tripartite ATP-independent periplasmic transporter. J Bacteriol. 2006;188(24):8407-12.
27. Salmon RC, Cliff MJ, Rafferty JB, Kelly DJ. The CouPSTU and TarPQM transporters in Rhodopseudomonas palustris: redundant, promiscuous uptake systems for lignin-derived aromatic substrates. PLoS One. 2013;8(3):e59844.
28. Hosaka M, Kamimura N, Toribami S, Mori K, Kasai D, Fukuda M, Masai E. Novel tripartite aromatic acid transporter essential for terephthalate uptake in Comamonas sp. strain E6. Appl Environ Microbiol. 2013;79(19):6148-55.
